# Supplementary material for: The Functional Characterization of TcMyoF Implicates a Family of Cytostome-Cytopharynx Targeted Myosins as Integral to the Endocytic Machinery of Trypanosoma cruzi
Source: PubMed Central journal article supplement (PMC7300353; doi:10.1128/msphere.00313-20), 2020-06-17

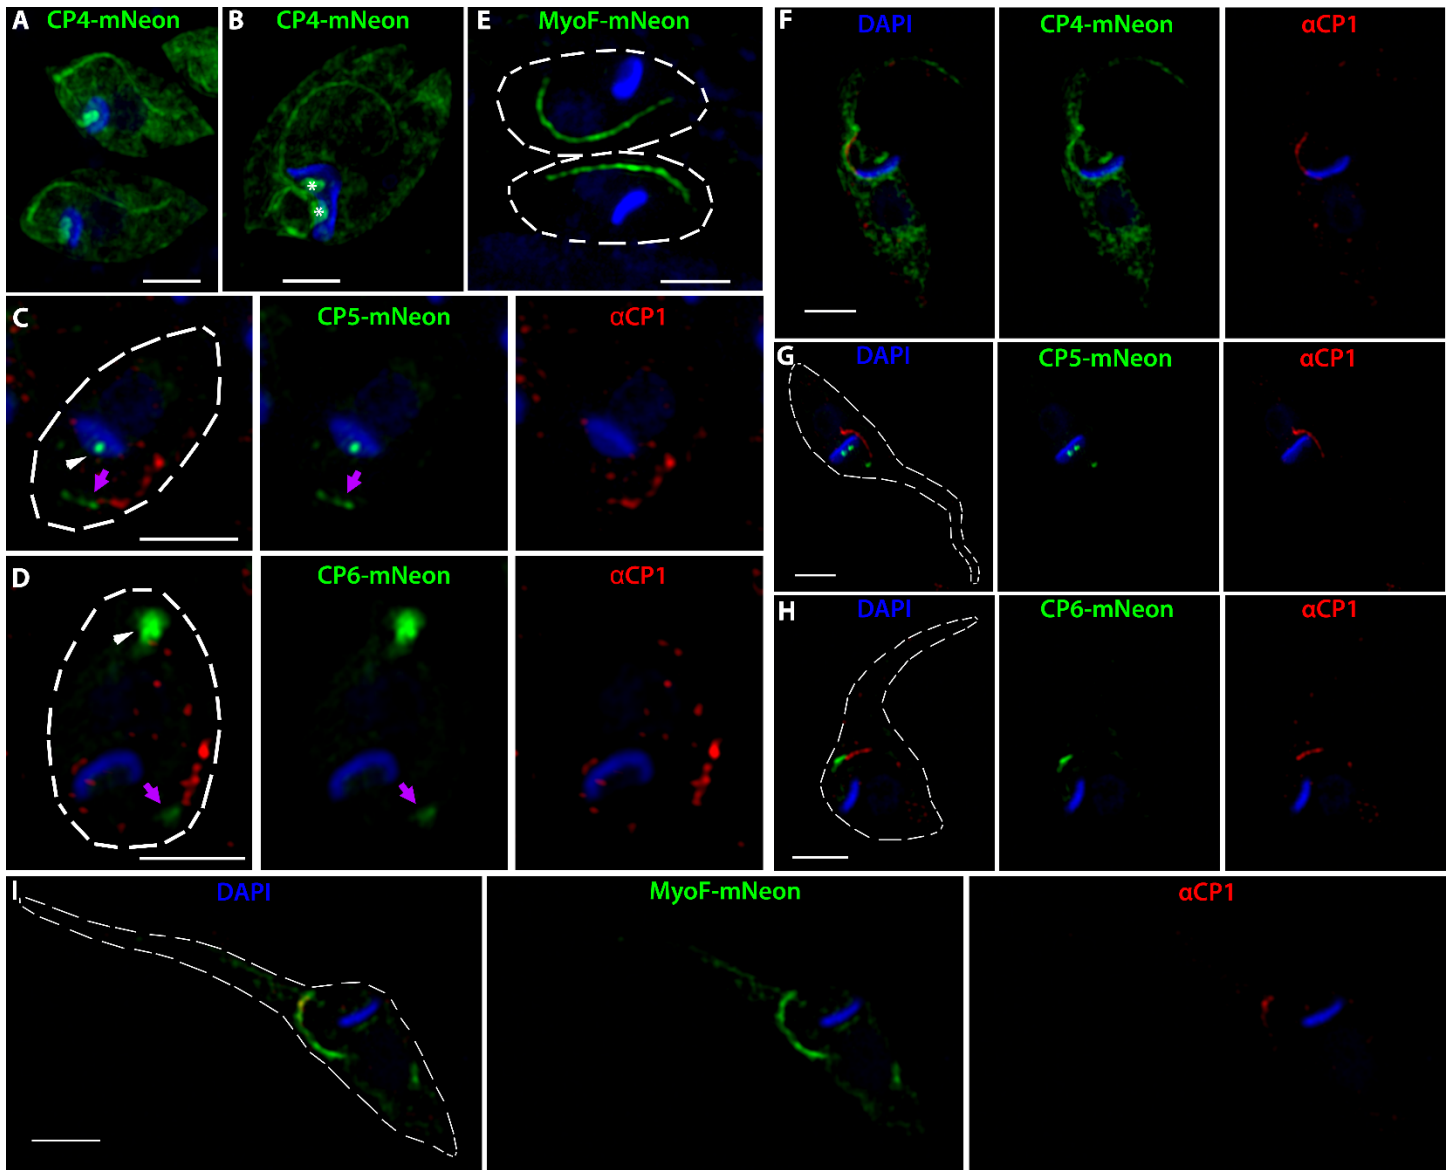

Supplement: mSphere.00313-20-sf001.pdf [file mSphere.00313-20-sf001.pdf]
