# Supplementary material for: The Functional Characterization of TcMyoF Implicates a Family of Cytostome-Cytopharynx Targeted Myosins as Integral to the Endocytic Machinery of Trypanosoma cruzi
Source: PubMed Central journal article supplement (PMC7300353; doi:10.1128/msphere.00313-20), 2020-06-17
Supplement: mSphere.00313-20-st001.pdf [file mSphere.00313-20-st001.pdf]

## Table of Primers Used in This Work

| Protospacer Mutagenesis and Repair           |      |                                                              |           |
|----------------------------------------------|------|--------------------------------------------------------------|-----------|
| Universal Protospacer Q5 Mutagenesis Reverse | MT28 | GGATCCACTAGAACTCTTGACAGACTTGGC                               | antisense |
| CP1 Protospacer Mutagenesis Forward          | MT18 | GTACCCGTTTCATCCTGTCAgttttagagctagaaatagcaagttaaataaggctag    | sense     |
| CP2 Protospacer Mutagenesis Forward          | MT30 | GTGCTCGAGAGGAACAGCAGgttttagagctagaaatagcaagttaaataaggctag    | sense     |
| MyoF Protospacer Mutagenesis Forward         | MT13 | ATTCAGAGTCGTGTGTTCTGgttttagagctagaaatagcaagttaaataaggc       | sense     |
| CP1 Blasticidin Repair Template Forward      | MT21 | ATGAATGGGGGCGATGACGACGCCACACGCCTCAGTGATCgccaagcctttgtctcaa   | sense     |
| CP1 Blasticidin Repair Template Reverse      | MT22 | AGCAACGGTGTGTCCTCTTCTAATTCATCTCCCACTTGCTtagccctcccacacata    | antisense |
| CP2 Blasticidin Repair Template Forward      | MT31 | ATGTCGCATGAAAGCAGTCCTTTCAGGTGGGCTCCGCTTAgccaagcctttgtctcaa   | sense     |
| CP2 Blasticidin Repair Template Reverse      | MT32 | TAAGGATTGTAACGATAAGAGCTCCCGTTCGTCCTCTCAttagccctcccacacataac  | antisense |
| MyoF Blasticidin Repair Template Forward     | MT17 | ATGGCGGAGGCTTCTGTAACATCCCACGATGGCTATTGTGTGccaagcctttgtctcaa  | sense     |
| MyoF Blasticidin Repair Template Reverse     | MT16 | ACGACTAAAGCTAGGAAAATATGGCTCGGGTGAATTCCCGCAttagccctcccacacata | antisense |
| CP1 Deletion Screen Forward                  | MT77 | GTGACTTGTGAGTTTACAAGGAGGGAGAGAGAG                            | sense     |
| CP1 Deletion Screen Reverse                  | MT78 | GGTTCACATTTACACAGGTGTATACCGTGC                               | antisense |
| CP2 Deletion Screen Forward                  | MT75 | GCCACTTTAAAGAAGCGCAAGGTTGAGG                                 | sense     |
| CP2 Deletion Screen Reverse                  | MT76 | CAACAGTCATCAAATACAGGCATACACGCAAACG                           | antisense |

|                                       |       |                                                             |           |
|---------------------------------------|-------|-------------------------------------------------------------|-----------|
| MyoF Deletion Screen Forward          | MT79  | GAGGAAGTGCCAAAAGTTTGGTGACAGG                                | sense     |
| MyoF Deletion Screen Reverse          | MT80  | CGGTATAAATGTGTTTCTATACGATAAATACGATAGCGATACTCAAC             | antisense |
| MyoF-Ty Repair Template Forward       | CS97  | ATGGCGGAGGTTTCTGTAAAATCCCACGATGGCTATTGTGTG                  | sense     |
| MyoF-Ty Repair Template Reverse       | CS98  | TACTAAACAAAACCTAACGACTAAAGCTAGTAAAATACGCTATTCCTTTGCCCTCGGAC | antisense |
| <b>Assembly of pMiniTREX Variants</b> |       |                                                             |           |
| Ampicillin F for miniTrex             | PZ87  | tctcaagaagatcctttgatcttttctacgTTACCAATGCTTAATCAGTGAGGC      | sense     |
| Ampicillin R for miniTrex             | PZ29  | CACCAAATAAGCCCCGCAAGGAAACTGGTGtatgtatccgctcatgagacaataac    | antisense |
| picoZ Origin Region Forward           | PZ28  | GTCGCCGCGGGTACCTCGTGTGCACGGCTGgtttttccataggctccgcc          | sense     |
| picoz Origin Region Reverse           | PZ 67 | cgtagaaaagatcaaaggatcttcttgagatcc                           | antisense |
| Ribosomal Promoter and HX1 Forward    | PZ23  | CACCAGTTTCCTTGCGG                                           | sense     |
| Ribosomal Promoter and HX1 Reverse    | CS59  | CATTCTAGACAAGACAACCTTATAGAGC                                | antisense |
| mNeonTy Forward                       | PZ24  | GCTCTATAAGTTGTCTTGTCTAGAATGGTGTCCAAAGGAGAAGAAGACA           | sense     |
| mNeonTy Reverse                       | PZ83  | CAAAGAAAGACCTGAAGTCATCGCCACGCTTAATCAAGGGGATCTTGATTAGTATGCAC | antisense |
| minimal GAPDH Forward                 | PZ34  | GCGTGGCGATGACTTCAGGTCTTTCTTTTGC                             | sense     |
| minimal GAPDH Reverse                 | PZ35  | AATGCACAAACACTAAACTACACCTTAAACACCATCAGTGAAG                 | antisense |
| Neomycin Resistance Cassette Forward  | PZ82  | GTTTAAGGTGTAGTTTAGTGTGTTTGTGCATTATGATTGAACAGGACGGACTC       | sense     |
| Neomycin Resistance Cassette Reverse  | PZ27  | ACAAATATAATGAGAGTAGAGGTATCCGTGTCAAAGAATTCGTCCAGGAGAC        | antisense |
| F2Postaglandin Synthase 3'UTR Forward | PZ3   | CACGGATACCTCTACTCTCATTATATTTGTCTTTTTTATCAAATAAGCACGGATTAGC  | sense     |
| F2Postaglandin Synthase 3'UTR Forward | PZ4   | CAGCCGTGCACACGAGGTACCC                                      | antisense |

|                                               |      |                                                                 |           |
|-----------------------------------------------|------|-----------------------------------------------------------------|-----------|
| miniTrex Forward for guideRNA Insertion       | SE8  | CCCAACGAGTTTCTTCAAATATGCAGC                                     | sense     |
| miniTrex Reverse for guideRNA Insertion       | SE7  | GGATCCACTAGAACTCTTGACAGAC                                       | antisense |
| guideRNA Forward                              | MT24 | GTCTGTGCAAGAGTTCTAGTGGATCCgttttagagctagaaatagcaagttaaataagg     | sense     |
| guideRNA Reverse                              | MT25 | CTGCATATTTTGAAGAACTCGTTGGGggatccaaaaaagcaccgactc                | antisense |
| HX1 Reverse for spCas9 Insertion              | CS59 | CATTCTAGACAAGACAACCTTATAGAGC                                    | antisense |
| mNeon Forward for spCas9 Insertion            | NC93 | GTGTCAAAGGAGAAGAAGAC                                            | sense     |
| spCas9 Forward for miniTrex Insertion         | PZ48 | TCTATAAGTTGTCTTGTCTAGAATGgacaagaagtacagcatcggcctggacatcg        | sense     |
| spCas9 Reverse for miniTrex Insertion         | PZ47 | TCTTCTTCTCCTTTGGACACagatccgctgctgccgttgctcc                     | antisense |
| Forward for Bba_B1006 Terminator Insertion    | MT92 | GGGTTTTTTTTTGTCTAGAATGGTGTCAAAGGAGAAGAAGAC                      | sense     |
| Reverse for Bba_B1006 Terminator Insertion    | MT91 | GGGGTTTTTTTTTAGACAACCTTATAGAGCAAAAAAAAAAAGAAAAGACATCATAAAAGAAG  | antisense |
| Bba_B1006 Terminator Duplex Sense Strand      | PZ94 | AAGTTGTCTAAAAAAAAACCCCGCCCTGACAGGGCGGGGTTTTTTTTTGTCTAGAATGG     | sense     |
| Bba_B1006 Terminator Duplex Anti-Sense Strand | PZ95 | CCATTCTAGACAAAAAAAAACCCCGCCCTGTCAGGGGCGGGGTTTTTTTTTGTCTAGAACCTT | antisense |
| <b>Myosin C-termini Constructs</b>            |      |                                                                 |           |
| GAPDH Universal Forward for Myo C-t tests     | PZ24 | GCGTGGCGATGACTTCAGGTCTTCTTTTGC                                  | sense     |
| mNeon-Ty Universal Reverse for Myo C-t tests  | N21  | GAAGTGCATACTAATCAAGATCCCCTTGAT                                  | antisense |
| MyoF C-t Forward for pMiniTrex                | CS76 | GCATACTAATCAAGATCCCCTTGATCAGGATGCTTTACGAAGGGAAAAGG              | sense     |

|                                                     |      |                                                            |           |
|-----------------------------------------------------|------|------------------------------------------------------------|-----------|
| MyoF C-t<br>Reverse for<br>pMiniTrex                | CS77 | GAAAGACCTGAAGTCATCGCCACGCTTAACGACTAAAGCTAGTAAAATACGGCTCG   | antisense |
| MyoF C-tFirst<br>Part Reverse<br>for pMiniTrex      | CS78 | CAAAGAAAGACCTGAAGTCATCGCCACGCTTACCCGAGCAACGAAGGTGACC       | antisense |
| MyoF C-t<br>Second Part<br>Forward for<br>pMiniTrex | CS79 | GCATACTAATCAAGATCCCCTTGATCCTGCAGTTTTATCAAGGCG              | sense     |
| MyoC Yqik<br>Forward for<br>pMiniTrex               | CS74 | GCATACTAATCAAGATCCCCTTGATTGAAAAGCGTTGGATTGACTCC            | sense     |
| MyoC Yqik<br>Reverse for<br>pMiniTrex               | CS83 | CAAAGAAAGACCTGAAGTCATCGCCACGCTTAACGTCTCTGCGCTCTCG          | antisense |
| MyoC C-t<br>Forward for<br>pMiniTrex                | CS82 | GCATACTAATCAAGATCCCCTTGATGAGGCAGAAAATGCTCGTCTAGAGG         | sense     |
| MyoC C-t<br>Reverse for<br>pMiniTrex                | CS75 | GAAAGACCTGAAGTCATCGCCACGCTTAAAACCAAAGTCCATCGTACTTTGC       | antisense |
| MyoB C-t<br>Forward for<br>pMiniTrex                | CS84 | GCATACTAATCAAGATCCCCTTGATCATTGTGAAGCAATTCGGTTGGC           | sense     |
| MyoB C-t<br>Reverse for<br>pMiniTrex                | CS85 | CAAAGAAAGACCTGAAGTCATCGCCACGCTTACGCCAGCGTTTTGAGCG          | antisense |
| MyoE C-t<br>Forward for<br>pMiniTrex                | CS86 | GCATACTAATCAAGATCCCCTTGATCGGTATTTGCTTTGTACATCACTGATTATTCAG | sense     |
| MyoE C-t<br>Reverse for<br>pMiniTrex                | CS87 | CAAAGAAAGACCTGAAGTCATCGCCACGCTTATTGCTCTGATCCAAACACGCTATCC  | antisense |
